# Supplementary material
Source: publisher site journal article supplement (https://www.spandidos-publications.com/2633/downloadSupplementary)
Supplement: Supplementary file 1 [file downloadSupplementary]

## Sheet: Table S9 Down_GO_enrichment_P
Table SIX. Down_GO_enrichment_P.
#Term	Database	ID	Input number	Background number	P-value	Corrected P-value	Input	Hyperlink
cell adhesion	Gene Ontology	GO:0007155	17	445	3.77837e-08	1.13351e-06	SSPN|CDSN|SIRPA|PCDHB3|PCDHB2|PKP1|TNFAIP6|VCAN|KIAA1462|SELPLG|PCDHAC2|ITGA10|MAG|CD22|LPXN|COL6A3|RPSAP58	http://amigo.geneontology.org/cgi-bin/amigo/term_details?term=GO:0007155
leukocyte migration	Gene Ontology	GO:0050900	7	113	2.3248e-05	0.000348719	INPP5D|JAM2|SIRPA|CD177|SELPLG|MAG|PDE4B	http://amigo.geneontology.org/cgi-bin/amigo/term_details?term=GO:0050900
integrin-mediated signaling pathway	Gene Ontology	GO:0007229	5	76	0.000271219	0.00271219	CEACAM1|ADAM11|ITGA10|PLEK|ADAMTS13	http://amigo.geneontology.org/cgi-bin/amigo/term_details?term=GO:0007229
extracellular matrix organization	Gene Ontology	GO:0030198	9	312	0.00059489	0.00358597	WNT3A|COL8A2|JAM2|VCAN|TMPRSS6|ITGA10|ABI3BP|COL6A3|A2M	http://amigo.geneontology.org/cgi-bin/amigo/term_details?term=GO:0030198
homophilic cell adhesion	Gene Ontology	GO:0007156	6	141	0.00069677	0.00358597	PCDHAC2|PCDHB3|PCDHB2|CDHR3|CEACAM1|PCDHGA1	http://amigo.geneontology.org/cgi-bin/amigo/term_details?term=GO:0007156
osteoblast differentiation	Gene Ontology	GO:0001649	5	96	0.000796262	0.00358597	RUNX2|WNT3A|SHOX2|VCAN|CYP24A1	http://amigo.geneontology.org/cgi-bin/amigo/term_details?term=GO:0001649
blood coagulation	Gene Ontology	GO:0007596	11	469	0.000836727	0.00358597	INPP5D|SIRPA|JAM2|SELPLG|CD177|PLCG2|ITGA10|MAG|MYB|PLEK|A2M	http://amigo.geneontology.org/cgi-bin/amigo/term_details?term=GO:0007596
synaptic transmission	Gene Ontology	GO:0007268	9	389	0.00274117	0.0102794	SLC6A3|KCNJ4|PCDHB3|PCDHB2|KCNK6|SLC17A7|HCN4|CACNA1A|SLC6A12	http://amigo.geneontology.org/cgi-bin/amigo/term_details?term=GO:0007268
visual perception	Gene Ontology	GO:0007601	6	193	0.00344223	0.0114741	RGS16|GPR143|GRK1|GPR179|MIP|RP1L1	http://amigo.geneontology.org/cgi-bin/amigo/term_details?term=GO:0007601
angiogenesis	Gene Ontology	GO:0001525	6	206	0.00472862	0.0141859	COL8A2|ECSCR|SCG2|TMPRSS6|ROBO4|CEACAM1	http://amigo.geneontology.org/cgi-bin/amigo/term_details?term=GO:0001525
positive regulation of gene expression	Gene Ontology	GO:0010628	5	151	0.00574859	0.015678	KIT|C1QTNF1|ALOX12B|CSF2|LCN2	http://amigo.geneontology.org/cgi-bin/amigo/term_details?term=GO:0010628
ion transport	Gene Ontology	GO:0006811	5	163	0.00788799	0.01972	SLC6A12|SLC22A31|SLC17A7|STEAP2|LCN2	http://amigo.geneontology.org/cgi-bin/amigo/term_details?term=GO:0006811
inflammatory response	Gene Ontology	GO:0006954	7	307	0.00868702	0.020047	TNFRSF1B|TNFAIP6|SCG2|LYZ|KIT|C4A|GGT5	http://amigo.geneontology.org/cgi-bin/amigo/term_details?term=GO:0006954
multicellular organismal development	Gene Ontology	GO:0007275	9	474	0.00972809	0.0208459	TMEM88|C19orf57|SSC5D|DND1|VCAN|DKK3|EBF4|PKP1|SPATA6	http://amigo.geneontology.org/cgi-bin/amigo/term_details?term=GO:0007275
intracellular signal transduction	Gene Ontology	GO:0035556	7	379	0.0248212	0.0496424	INPP5D|PAG1|SCG2|TMPRSS6|PLCG2|NOD2|RP1L1	http://amigo.geneontology.org/cgi-bin/amigo/term_details?term=GO:0035556
small molecule metabolic process	Gene Ontology	GO:0044281	17	1413	0.036227	0.0679256	SULT1C2|NDUFA7|ABCG2|PCK1|INPP5D|PLCG2|CACNA1A|ALOX5|VCAN|PSMA2|CBS|SLC44A3|GGT5|UPB1|CYP24A1|ALOX12B|IDUA	http://amigo.geneontology.org/cgi-bin/amigo/term_details?term=GO:0044281
nervous system development	Gene Ontology	GO:0007399	5	278	0.059632	0.105233	PCDHAC2|PCDHB2|SERF1A|SHOX2|PCDHB3	http://amigo.geneontology.org/cgi-bin/amigo/term_details?term=GO:0007399
immune response	Gene Ontology	GO:0006955	7	476	0.0689511	0.112496	TNFRSF1B|IGHA2|CSF2|CD7|IGHE|HLA-DOB|HLA-DMA	http://amigo.geneontology.org/cgi-bin/amigo/term_details?term=GO:0006955
transmembrane transport	Gene Ontology	GO:0055085	8	578	0.0712473	0.112496	SLC6A3|ABCG2|SLC44A3|SLC17A7|SPNS2|SLC6A12|MIP|CP	http://amigo.geneontology.org/cgi-bin/amigo/term_details?term=GO:0055085
signal transduction	Gene Ontology	GO:0007165	12	1045	0.0957502	0.143625	TNFAIP6|INPP5D|HLA-DOB|LPXN|GPR143|PAG1|AMHR2|UNC5CL|KIT|LGALS9|PKP1|CD300C	http://amigo.geneontology.org/cgi-bin/amigo/term_details?term=GO:0007165
transport	Gene Ontology	GO:0006810	5	349	0.124646	0.178066	LAPTM5|ABCG2|SLC6A12|LCN10|OSCP1	http://amigo.geneontology.org/cgi-bin/amigo/term_details?term=GO:0006810
negative regulation of transcription from RNA polymerase II promoter	Gene Ontology	GO:0000122	7	565	0.135643	0.184967	MDFI|TP63|NPAS1|MAPK15|SHOX2|HOXA2|MYB	http://amigo.geneontology.org/cgi-bin/amigo/term_details?term=GO:0000122
apoptotic process	Gene Ontology	GO:0006915	7	605	0.173347	0.223787	TP63|INPP5D|ECSCR|PSMA2|TNFRSF9|PKP1|CARD6	http://amigo.geneontology.org/cgi-bin/amigo/term_details?term=GO:0006915
cell differentiation	Gene Ontology	GO:0030154	5	395	0.17903	0.223787	SPATA6|TEX19|ROBO4|ETV7|ECSCR	http://amigo.geneontology.org/cgi-bin/amigo/term_details?term=GO:0030154
positive regulation of transcription from RNA polymerase II promoter	Gene Ontology	GO:0045944	8	749	0.205173	0.242441	WNT3A|TP63|GRHL3|SHOX2|HOXA2|NOD2|MESP2|MYB	http://amigo.geneontology.org/cgi-bin/amigo/term_details?term=GO:0045944
innate immune response	Gene Ontology	GO:0045087	8	754	0.210116	0.242441	APOBEC3H|LCN2|SSC5D|KIT|PLCG2|IGHE|NOD2|C4A	http://amigo.geneontology.org/cgi-bin/amigo/term_details?term=GO:0045087
positive regulation of cell proliferation	Gene Ontology	GO:0008284	5	429	0.224066	0.248962	WNT3A|RUNX2|NOD2|CSF2|KIT	http://amigo.geneontology.org/cgi-bin/amigo/term_details?term=GO:0008284
negative regulation of transcription, DNA-dependent	Gene Ontology	GO:0045892	5	464	0.273578	0.293119	RUNX2|TP63|CIART|MYB|DKK3	http://amigo.geneontology.org/cgi-bin/amigo/term_details?term=GO:0045892
transcription, DNA-dependent	Gene Ontology	GO:0006351	11	1857	0.844383	0.873499	TP63|CIART|LPXN|NPAS1|RUNX2|EBF4|HOXA2|ZNF836|MESP2|MYB|ZNF773	http://amigo.geneontology.org/cgi-bin/amigo/term_details?term=GO:0006351
regulation of transcription, DNA-dependent	Gene Ontology	GO:0006355	5	1305	0.973509	0.973509	LPXN|MYB|ZNF773|EBF4|ZNF836	http://amigo.geneontology.org/cgi-bin/amigo/term_details?term=GO:0006355
